# Supplementary material for: Theoretical insights into graphenylene-based triple-atom catalysts for efficient nitrogen fixation
Source: Royal Society of Chemistry journal article supplement (doi:10.1039/d2cp03378j), 2022-01-01
Supplement: d2cp03378j1.pdf [file d2cp03378j1.pdf]

## Theoretical insights into the graphenylene-based triple-atom catalysts for efficient nitrogen fixation

Zhili Yin,<sup>ac</sup> Xingzi Fang,<sup>b</sup> Ziyang Liu,<sup>b</sup> Yan Gao,<sup>b</sup> Ziqing Wang,<sup>\*ac</sup> Haifeng Wang<sup>\*b</sup> and Zhong Wei<sup>\*ac</sup>

<sup>a</sup> School of Chemistry and Chemical Engineering, Shihezi University, Shihezi 832003, China

<sup>b</sup> Department of Physics, College of Science, Shihezi University, Xinjiang 832003, China

<sup>c</sup> Key Laboratory for Green Processing of Chemical Engineering of Xinjiang Bingtuan, Shihezi University, Shihezi 832003, China

\*E-mail: Steven\_weiz@sina.com (Zhong Wei); whfeng@shzu.edu.cn (Haifeng Wang);

wzq20070420@163.com ( Ziqing Wang)

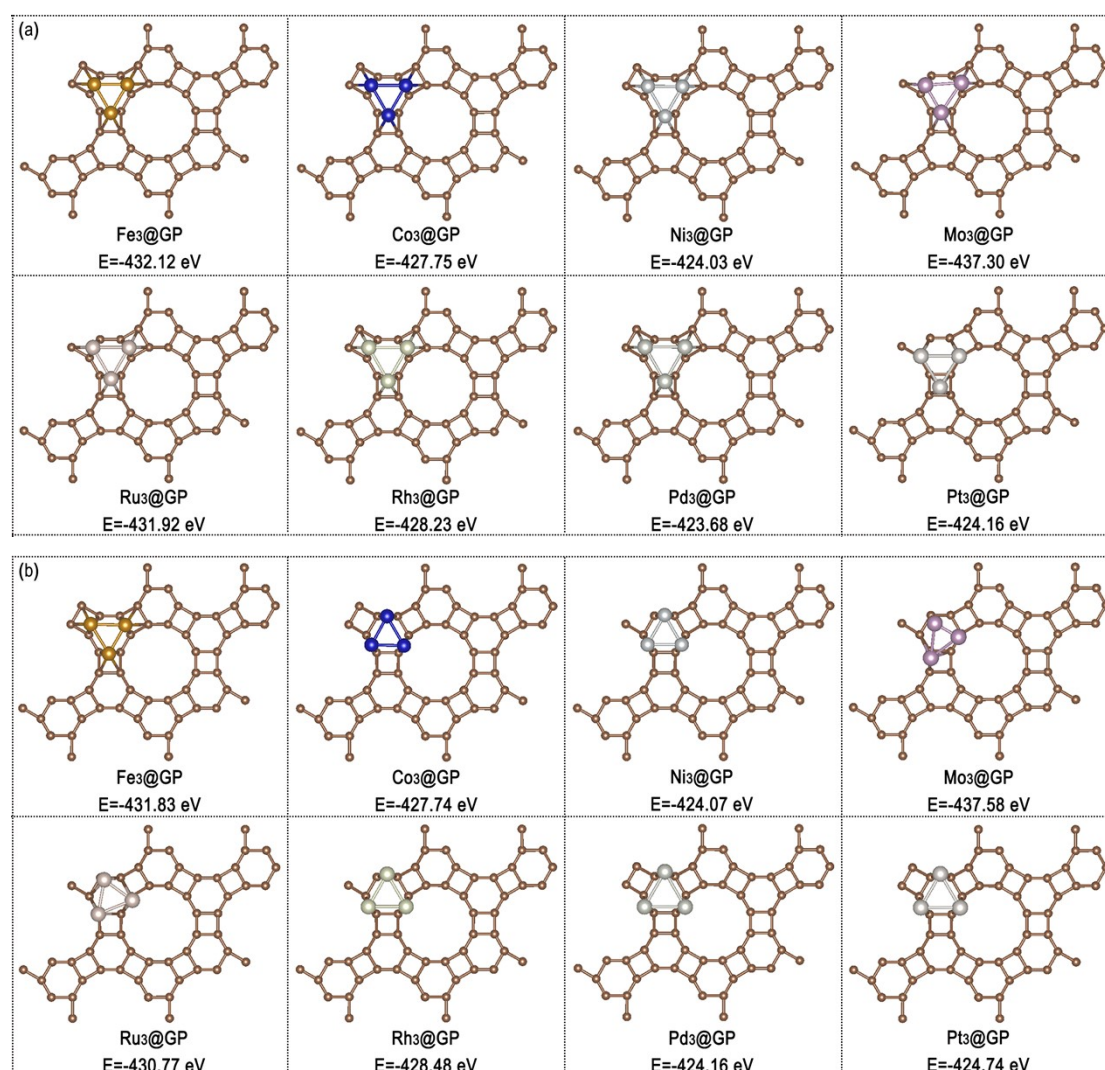

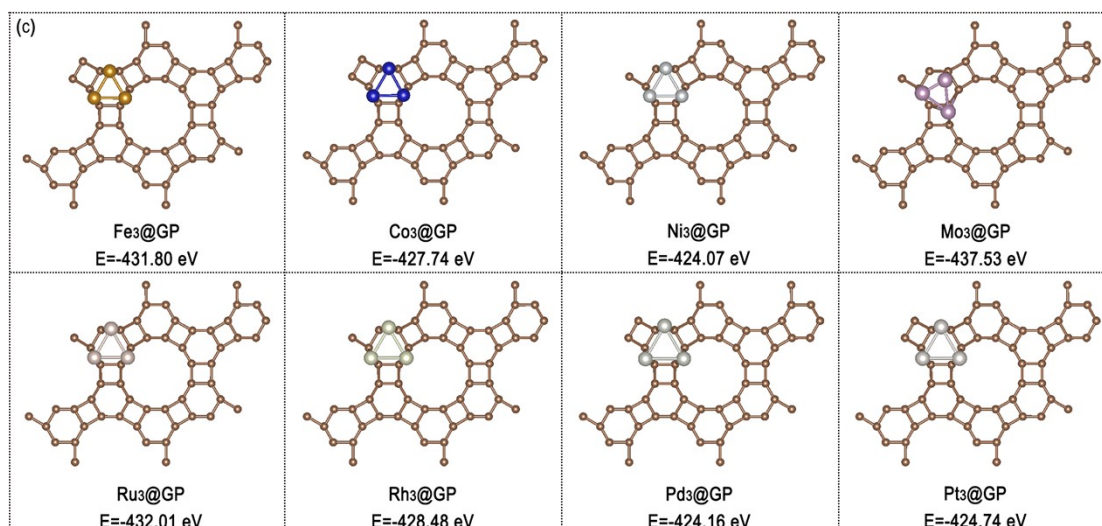

**Fig. S1.** Optimization geometry structures and the corresponding energies of TM<sub>3</sub>@GP in different (a) A, (b) B, and (c) C configurations.

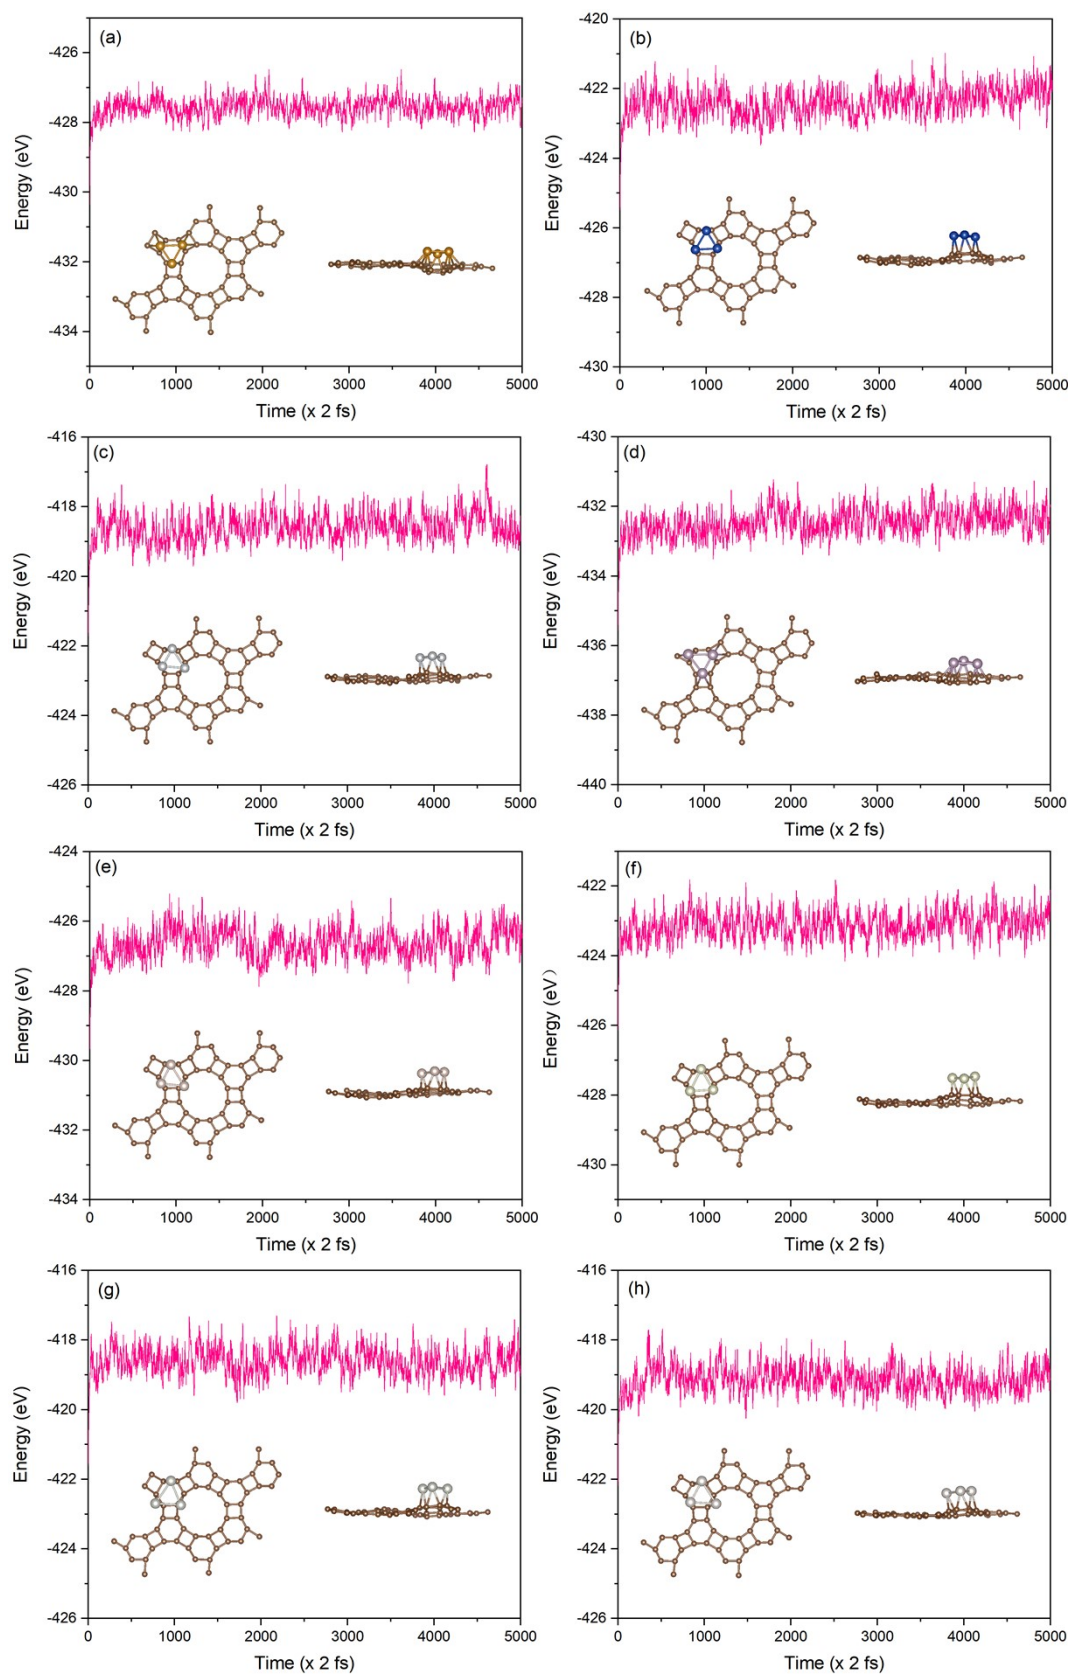

**Fig. S2.** AIMD simulations run at 300 K for (a)  $\text{Fe}_3@GP$ , (b)  $\text{Co}_3@GP$ , (c)  $\text{Ni}_3@GP$ , (d)  $\text{Mo}_3@GP$ , (e)  $\text{Ru}_3@GP$ , (f)  $\text{Rh}_3@GP$ , (g)  $\text{Pd}_3@GP$  and (h)  $\text{Pt}_3@GP$ .

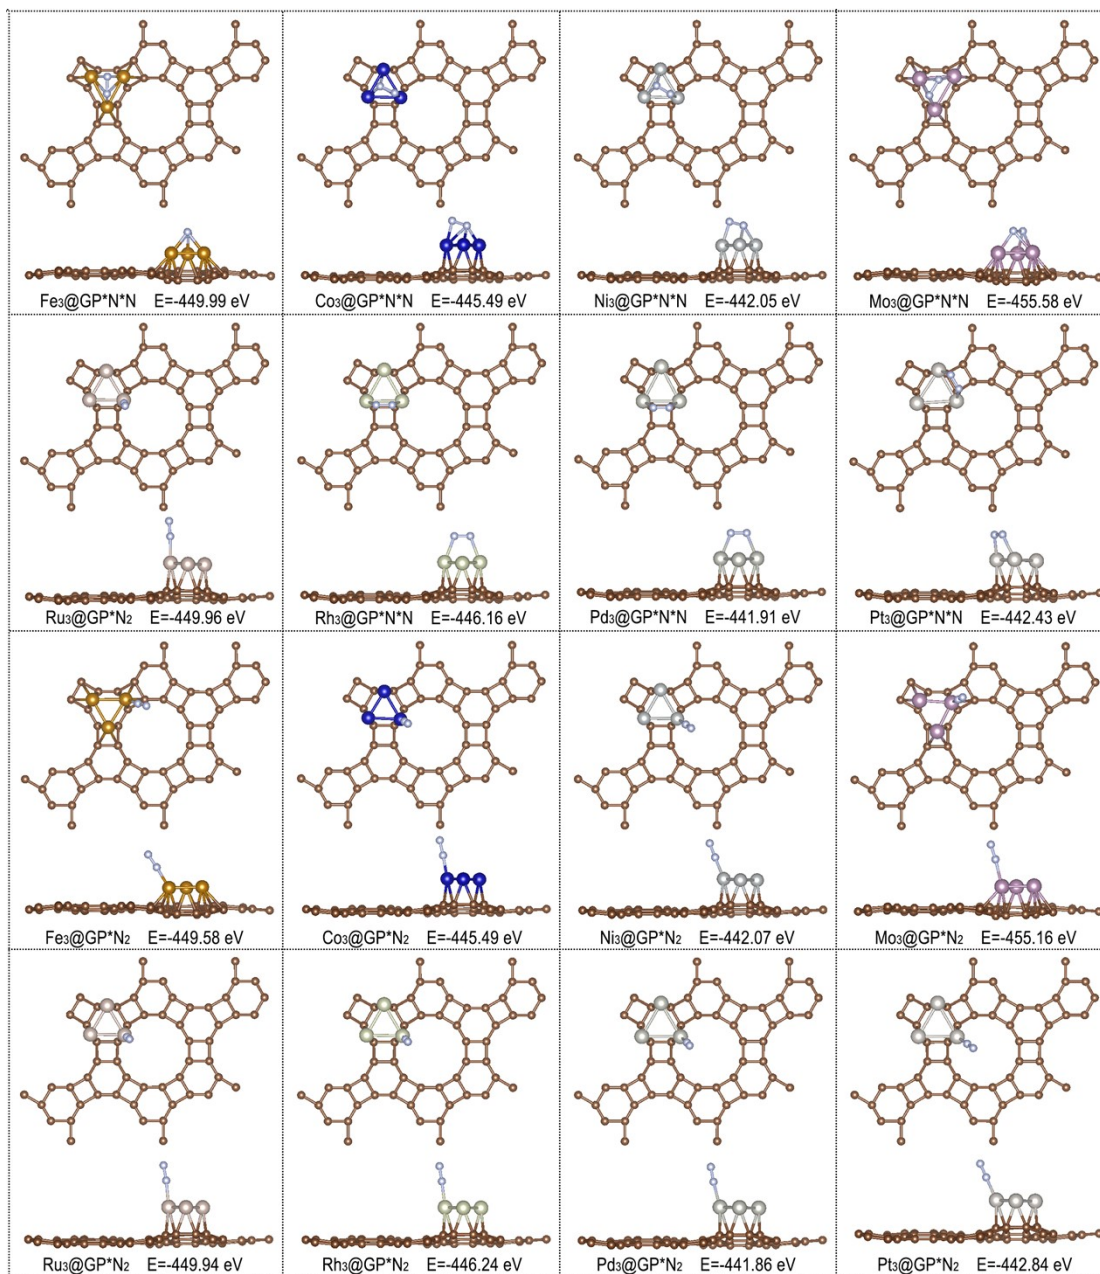

**Fig. S3.** The configurations of N<sub>2</sub> adsorption on TM<sub>3</sub>@GP systems.



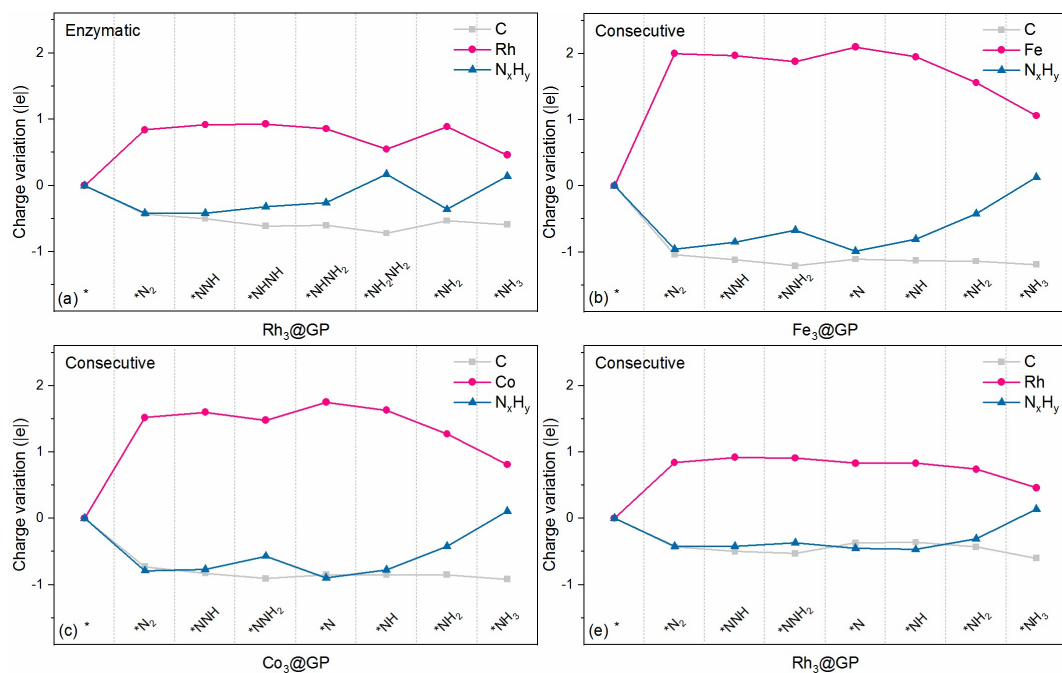

**Fig. S4.** Bader charge transfer during the (a) enzymatic pathway of  $\text{Rh}_3@GP$ , consecutive pathway of (b)  $\text{Fe}_3@GP$ , (c)  $\text{Co}_3@GP$  and (d)  $\text{Rh}_3@GP$ .

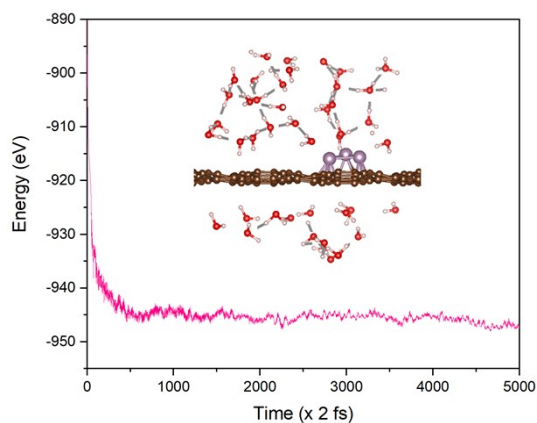

**Fig. S5.** AIMD simulations run at 300 K for  $\text{Mo}_3@GP$  in water environment.

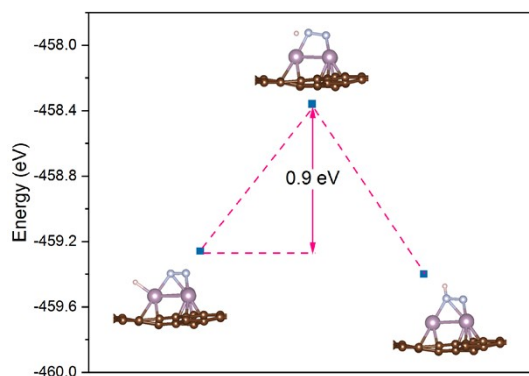

**Fig.S6.** Kinetic barrier from the  $*H + *N*N$  to  $*N*NH$  on  $\text{Mo}_3@GP$ .

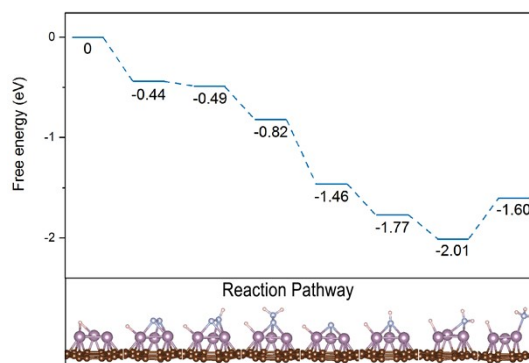

**Fig. S7.** The NRR process of H-terminated Mo<sub>3</sub>@GP by consecutive pathway.

**Table S1.** Fractional Coordinates of Mo<sub>3</sub>@GP.

CONTCAR

```

1.0000000000000000
13.5082998276000001    0.0000000000000000    0.0000000000000000
6.7529881567999999    11.6989702353999991    0.0000000000000000
0.0749937988000000    -0.0288168372000000    19.7285370562000004

```

```

C      Mo
48      3

```

Direct

```

0.2713085338385107    0.0773767369336980    0.4102711727663714
0.2715842316210381    0.1778478817972970    0.4104552784227321
0.1616080147224922    0.0777168840342749    0.4031832276684181
0.4357870727502246    0.2408258498261842    0.4084848135900022
0.4365098847762365    0.3488899204533934    0.3997693028894641
0.3342502855156004    0.2410270336764291    0.4098519252671104
0.0605279973636933    0.1785476590481795    0.3983881631067653
0.1619811203959177    0.2874027222229855    0.4037076031493691
0.0607261139222597    0.2881212367316013    0.3986801787689992
0.2249609266674674    0.3487673348935934    0.4022575673567492
0.3359758239918317    0.4492729993374059    0.3896154294267611
0.2246118732933000    0.4498577779697586    0.3906034047405329
0.7717271269454700    0.0778912654489607    0.4009235790406402
0.7720121604607016    0.1785925374701074    0.3958823444278174
0.6626048373520242    0.0775677268227639    0.4080741292534690
0.9356898774934648    0.2413161887664743    0.3922615719188899
0.9359167642019065    0.3508284273457013    0.3925346463480123
0.8343785839970735    0.2413720392330816    0.3912992155463075
0.5615273774189157    0.1782237703404320    0.4079737183710227
0.6621050043334746    0.2882272380490133    0.3953717822855705
0.5615781216545828    0.2873789431941106    0.4004987755478810
0.7248008341971264    0.3509584651822555    0.3906993933016904
0.8346540601631758    0.4522853686134423    0.3915231378579831
0.7249901806324948    0.4522970247104255    0.3906469298531690

```

|                    |                    |                    |
|--------------------|--------------------|--------------------|
| 0.2730568062998753 | 0.5733595163663165 | 0.3788023767813516 |
| 0.2741028067043573 | 0.6791392204202148 | 0.3795132639374412 |
| 0.1636633045929852 | 0.5724100927993362 | 0.3776453353617419 |
| 0.4374840569639029 | 0.7410298208791837 | 0.4001639953738875 |
| 0.4353766597276982 | 0.8501418067598319 | 0.4092675823043625 |
| 0.3366581734549795 | 0.7406224944615157 | 0.3887125222555089 |
| 0.0573181334885287 | 0.6789702751205532 | 0.3785313715698133 |
| 0.1641901144270453 | 0.7889850666330317 | 0.3806430031491154 |
| 0.0585348722656458 | 0.7882293117846620 | 0.3805761145653772 |
| 0.2250396175663608 | 0.8518937696397932 | 0.3899344793539856 |
| 0.3336228038382281 | 0.9516132527969796 | 0.4098795400495504 |
| 0.2247319063149251 | 0.9531326215879581 | 0.4017397011670731 |
| 0.7720845687462459 | 0.5773746977401468 | 0.3964948473417843 |
| 0.7714093672773082 | 0.6785316856175722 | 0.4022107657896184 |
| 0.6624631306060462 | 0.5774277235419125 | 0.3956148389149229 |
| 0.9345300199727961 | 0.7405057744316211 | 0.3911773212437066 |
| 0.9344003218961301 | 0.8516740326036875 | 0.3909950871878514 |
| 0.8332415372724757 | 0.7410840970966569 | 0.4021275029983493 |
| 0.5618842481608868 | 0.6785732740917383 | 0.4006663765397946 |
| 0.6618801698764576 | 0.7883454559564297 | 0.4094298855987895 |
| 0.5612309281840909 | 0.7882859941932130 | 0.4088338622387473 |
| 0.7256132382824524 | 0.8505345093511716 | 0.4100001385061963 |
| 0.8338876644205404 | 0.9526511179195101 | 0.4006115140921477 |
| 0.7256786908578993 | 0.9519399490616509 | 0.4088767012116173 |
| 0.2199166689744961 | 0.5669260671436238 | 0.4846931514254849 |
| 0.2354045445069191 | 0.7461327795260965 | 0.4843611314725456 |
| 0.0551301416117377 | 0.7316615363739948 | 0.4857596756635006 |

**Table S2.** Averaged bond lengths between TM-TM, averaged bond lengths between TM-C, Bader charge dispersion of TM<sub>3</sub>@GP, binding energies and cohesive energies of TM<sub>3</sub>@GP.

| Name                | d <sub>TM-TM</sub> /Å | d <sub>TM-C</sub> /Å | q <sub>TM3</sub> / e | q <sub>GP</sub> / e | E <sub>b</sub> /eV | E <sub>coh</sub> /eV |
|---------------------|-----------------------|----------------------|----------------------|---------------------|--------------------|----------------------|
| Fe <sub>3</sub> @GP | 2.33                  | 2.12                 | 1.05                 | -1.05               | -8.46              | -4.28                |
| Co <sub>3</sub> @GP | 2.29                  | 2.03                 | 0.72                 | -0.72               | -8.49              | -4.39                |
| Ni <sub>3</sub> @GP | 2.37                  | 2.00                 | 0.62                 | -0.62               | -8.51              | -4.44                |
| Mo <sub>3</sub> @GP | 2.43                  | 2.22                 | 1.47                 | -1.47               | -10.16             | -6.82                |
| Ru <sub>3</sub> @GP | 2.47                  | 2.08                 | 0.66                 | -0.66               | -11.05             | -6.74                |
| Rh <sub>3</sub> @GP | 2.61                  | 2.08                 | 0.46                 | -0.46               | -10.19             | -5.75                |
| Pd <sub>3</sub> @GP | 2.84                  | 2.14                 | 0.33                 | -0.33               | -6.35              | -3.89                |
| Pt <sub>3</sub> @GP | 2.72                  | 2.12                 | 0.04                 | -0.04               | -9.6               | -5.84                |

**Table S3.** The ΔG (H), ΔG (N<sub>2</sub>-side on), ΔG (N<sub>2</sub>-end on), ΔG (\*N\*NH) and ΔG (\*NNH) of TM<sub>3</sub>@GP.

| Name | ΔG (H)<br>/eV | ΔG (H)<br>(on GP)/eV | ΔG (*N*N)<br>/eV | d <sub>N-N</sub> /Å | ΔG (*N <sub>2</sub> )<br>/eV | d <sub>N-N</sub> /Å | ΔG (*N*NH)<br>/eV | ΔG<br>(*NNH)<br>/eV |
|------|---------------|----------------------|------------------|---------------------|------------------------------|---------------------|-------------------|---------------------|
| GP   | -             | 0.71                 | 3.36             | 1.26                | 0.29                         | 1.11                | -                 | -                   |

|                     |       |      |       |      |       |      |       |      |
|---------------------|-------|------|-------|------|-------|------|-------|------|
| Fe <sub>3</sub> @GP | -0.20 | 0.52 | -0.72 | 1.27 | -0.36 | 1.14 | 0.25  | 0.98 |
| Co <sub>3</sub> @GP | -0.53 | 1.04 | -0.62 | 1.23 | -0.64 | 1.14 | 0.48  | 1.11 |
| Ni <sub>3</sub> @GP | -0.76 | 1.00 | -0.84 | 1.22 | -0.90 | 1.14 | 0.72  | 1.38 |
| Mo <sub>3</sub> @GP | -0.74 | 0.40 | -1.10 | 1.34 | -0.76 | 1.14 | -0.07 | -    |
| Ru <sub>3</sub> @GP | -0.37 | 1.02 | -     | 1.14 | -0.81 | 1.14 | -     | 1.09 |
| Rh <sub>3</sub> @GP | -0.12 | 0.90 | -0.57 | 1.17 | -0.66 | 1.13 | 0.54  | 1.14 |
| Pd <sub>3</sub> @GP | -0.13 | 1.10 | -0.62 | 1.16 | -0.63 | 1.13 | 1.28  | 1.71 |
| Pt <sub>3</sub> @GP | -0.70 | 1.06 | -0.54 | 1.18 | -0.99 | 1.13 | -     | 1.33 |

**Table S4.** Zero-point and entropic corrections to the free energy of the gas phase and the adsorbed species along different catalysts.

| Name                                    | E/eV         | E <sub>ZPE</sub> /eV | TS/eV      | G/eV         |
|-----------------------------------------|--------------|----------------------|------------|--------------|
| H <sub>2</sub>                          | -6.76565715  | 0.268608             | 0.4019062  | -6.89895535  |
| N <sub>2</sub>                          | -16.62627336 | 0.149570             | 0.59182775 | -17.06853111 |
| NH <sub>3</sub>                         | -19.54133424 | 0.909892             | 0.5951074  | -19.22654964 |
| GP                                      | -413.37      | 0                    | 0          | -413.37      |
| Fe <sub>3</sub> @GP                     | -432.12      | 0                    | 0          | -432.12      |
| Co <sub>3</sub> @GP                     | -427.74      | 0                    | 0          | -427.74      |
| Ni <sub>3</sub> @GP                     | -424.07      | 0                    | 0          | -424.07      |
| Mo <sub>3</sub> @GP                     | -437.30      | 0                    | 0          | -437.30      |
| Ru <sub>3</sub> @GP                     | -432.01      | 0                    | 0          | -432.01      |
| Rh <sub>3</sub> @GP                     | -428.48      | 0                    | 0          | -428.48      |
| Pd <sub>3</sub> @GP                     | -424.16      | 0                    | 0          | -424.16      |
| Pt <sub>3</sub> @GP                     | -424.74      | 0                    | 0          | -424.74      |
| Fe <sub>3</sub> @GP (Enzymatic pathway) |              |                      |            |              |
| *N*N                                    | -449.99      | 0.18561              | 0.099618   | -449.904008  |
| *N*NH                                   | -453.52      | 0.50382              | 0.085801   | -453.101981  |
| *NH*NH                                  | -457.36      | 0.823844             | 0.094946   | -456.631102  |
| *NH*NH <sub>2</sub>                     | -460.95      | 1.168633             | 0.108435   | -459.889802  |
| *NH <sub>2</sub> *NH <sub>2</sub>       | -466.41      | 1.340669             | 0.234737   | -465.304068  |
| *NH <sub>2</sub>                        | -449.41      | 0.698205             | 0.083244   | -448.795039  |
| *NH <sub>3</sub>                        | -452.87      | 1.015197             | 0.142056   | -451.996859  |
| Co <sub>3</sub> @GP (Enzymatic pathway) |              |                      |            |              |
| *N*N                                    | -445.49      | 0.18042              | 0.124327   | -445.433907  |
| *N*NH                                   | -448.82      | 0.501535             | 0.086518   | -448.404983  |
| *NH*NH                                  | -452.87      | 0.802983             | 0.130019   | -452.197036  |
| *NH*NH <sub>2</sub>                     | -456.43      | 1.138509             | 0.159026   | -455.450517  |
| *NH <sub>2</sub> *NH <sub>2</sub>       | -461.98      | 1.346543             | 0.226595   | -460.860052  |
| *NH <sub>2</sub>                        | -444.47      | 0.63491              | 0.119075   | -443.954165  |
| *NH <sub>3</sub>                        | -448.52      | 1.002118             | 0.146887   | -447.664769  |
| Mo <sub>3</sub> @GP (Enzymatic pathway) |              |                      |            |              |
| *N*N                                    | -455.58      | 0.186673             | 0.073783   | -455.46711   |
| *N*NH                                   | -459.4       | 0.499624             | 0.084625   | -458.985001  |
| *NH*NH                                  | -463.03      | 0.820132             | 0.093553   | -462.303421  |
| *NH*NH <sub>2</sub>                     | -466.39      | 1.15969              | 0.124865   | -465.355175  |



|                                           |         |          |          |             |
|-------------------------------------------|---------|----------|----------|-------------|
| *NH <sub>2</sub> *NH <sub>2</sub>         | -472.74 | 1.361142 | 0.2027   | -471.581558 |
| *NH <sub>2</sub>                          | -454.99 | 0.691956 | 0.086646 | -454.38469  |
| *NH <sub>3</sub>                          | -458.37 | 1.003909 | 0.138416 | -457.504507 |
| Rh <sub>3</sub> @GP (Enzymatic pathway)   |         |          |          |             |
| *N*N                                      | -446.16 | 0.186399 | 0.14298  | -446.116581 |
| *N*NH                                     | -449.42 | 0.50363  | 0.111444 | -449.027814 |
| *NH*NH                                    | -453.19 | 0.811338 | 0.12861  | -452.507272 |
| *NH*NH <sub>2</sub>                       | -457.04 | 1.151873 | 0.143378 | -456.031505 |
| *NH <sub>2</sub> *NH <sub>2</sub>         | -460.53 | 1.472276 | 0.1366   | -459.194324 |
| *NH <sub>2</sub>                          | -445.46 | 0.695031 | 0.082305 | -444.847274 |
| *NH <sub>3</sub>                          | -449.36 | 1.011009 | 0.127279 | -448.47627  |
| Fe <sub>3</sub> @GP (Consecutive pathway) |         |          |          |             |
| *N*N                                      | -449.99 | 0.18561  | 0.099618 | -449.904008 |
| *N*NH                                     | -453.52 | 0.50382  | 0.085801 | -453.101981 |
| *N*NH <sub>2</sub>                        | -457.34 | 0.852902 | 0.09843  | -456.585528 |
| *N                                        | -441.58 | 0.101384 | 0.022644 | -441.50126  |
| *NH                                       | -446.11 | 0.388591 | 0.038932 | -445.760341 |
| *NH <sub>2</sub>                          | -449.38 | 0.697339 | 0.08454  | -448.767201 |
| *NH <sub>3</sub>                          | -452.89 | 1.020663 | 0.20222  | -452.071557 |
| Co <sub>3</sub> @GP (Consecutive pathway) |         |          |          |             |
| *N*N                                      | -445.49 | 0.18042  | 0.124327 | -445.433907 |
| *N*NH                                     | -448.82 | 0.501535 | 0.086518 | -448.404983 |
| *N*NH <sub>2</sub>                        | -452.86 | 0.847563 | 0.104114 | -452.116551 |
| *N                                        | -436.94 | 0.100298 | 0.023561 | -436.863263 |
| *NH                                       | -441.13 | 0.366355 | 0.045842 | -440.809487 |
| *NH <sub>2</sub>                          | -445.06 | 0.694582 | 0.085133 | -444.450551 |
| *NH <sub>3</sub>                          | -448.53 | 0.999984 | 0.141344 | -447.67136  |
| Mo <sub>3</sub> @GP (Consecutive pathway) |         |          |          |             |
| *N*N                                      | -455.58 | 0.186673 | 0.073783 | -455.46711  |
| *N*NH                                     | -459.4  | 0.499624 | 0.084625 | -458.985001 |
| *N*NH <sub>2</sub>                        | -463.12 | 0.84702  | 0.09983  | -462.37281  |
| *N                                        | -447.63 | 0.097551 | 0.02521  | -447.557659 |
| *NH                                       | -451.36 | 0.373562 | 0.04213  | -451.028568 |
| *NH <sub>2</sub>                          | -455.1  | 0.694807 | 0.08389  | -454.489083 |
| *NH <sub>3</sub>                          | -458.43 | 1.013529 | 0.135641 | -457.552112 |
| Rh <sub>3</sub> @GP (Consecutive pathway) |         |          |          |             |
| *N*N                                      | -446.16 | 0.186399 | 0.14298  | -446.116581 |
| *N*NH                                     | -449.42 | 0.50363  | 0.111444 | -449.027814 |
| *N*NH <sub>2</sub>                        | -452.66 | 0.827756 | 0.123964 | -451.956208 |
| *N                                        | -436.08 | 0.077261 | 0.068644 | -436.071383 |
| *NH                                       | -440.28 | 0.309819 | 0.085644 | -440.055825 |
| *NH <sub>2</sub>                          | -445.12 | 0.659192 | 0.134675 | -444.595483 |
| *NH <sub>3</sub>                          | -449.35 | 1.011403 | 0.125413 | -448.46401  |

---
